# Supplementary material
Source: PubMed Central journal article supplement (PMC6020838)
Supplement: NIHMS968709-supplement.pdf [file NIHMS968709-supplement.pdf]

**Appendix**  
**Computer-Facilitated 5A's for Smoking Cessation:**  
**A Randomized Trial of Technology to Promote Provider Adherence**  
**Satterfield et al.**

**Appendix Table 1.** Post-Primary Care Visit Interview: 5A's Adherence

---

All questions asked after identifying appropriate visit<sup>a</sup>

- During that visit, were you asked if you currently smoke? [Ask]
- During that visit, were you advised to stop smoking to improve your health? [Advise]
- During that visit, were you asked if you were currently interested in quitting smoking? [Assess]
- During that visit, were you asked if you have a plan to quit smoking? [Assist]
- During that visit, were you asked about steps you would be willing to take to get ready to quit smoking? [Assist]
- During that visit, were you asked about roadblocks to quitting smoking? [Assist]
- During that visit, were you given tips for coping with cigarette cravings or other ways to help you stop smoking? [Assist]
- During that visit, were you offered any patient education materials about quitting smoking (like a brochure or handout to read, or a website to visit)? [Assist]
- During that visit, were you given a phone number for a telephone quit line, self-help program, a quit smoking program, or a smartphone app? [Assist]
- During that visit, did your provider talk with you about medications that help people stop smoking (like Chantix or Zyban or Wellbutrin) or nicotine replacement products like nicotine patches or nicotine gum? [Assist]
- During that visit, did your provider give you a prescription for medication to help you quit smoking (like Chantix or Zyban or Wellbutrin) or coupons for nicotine replacement products, like nicotine patches or nicotine gum? [Assist]
- During that visit, were you asked to set a quit date to stop smoking? [Assist]
- During that visit, were you asked to schedule a follow-up appointment to talk with you again about smoking? [Arrange]

---

<sup>a</sup>All questions followed by whether the provider and/or the tablet performed the 5A's step.
